# Supplementary material for: An ensemble method for improving the estimation of planetary boundary layer height from radiosonde data
Source: Copernicus journal article supplement (doi:10.5194/amt-2023-78), 2023-05-10
Supplement: Supplementary file 1 [file amt-2023-78-supplement.pdf]

*Supplementary material for*

**An ensemble method for improving the estimation of planetary boundary layer height  
from radiosonde data**

**Xi Chen<sup>1,3</sup>, Ting Yang<sup>1\*</sup>, Zifa Wang<sup>1</sup>, Futing Wang<sup>1,4</sup>, Haibo Wang<sup>1,4</sup>**

<sup>1</sup> State Key Laboratory of Atmospheric Boundary Layer Physics and Atmospheric Chemistry (LAPC), Institute of Atmospheric Physics, Chinese Academy of Sciences, Beijing 100029, China

<sup>2</sup> Jiangsu Key Laboratory of Atmospheric Environment Monitoring and Pollution Control, Jiangsu Collaborative Innovation Center of Atmospheric Environment and Equipment Technology, School of Environmental Science & Engineering, Nanjing University of Information Science & Technology, Nanjing, 210044, China

<sup>3</sup> University of Chinese Academy of Sciences, Beijing 100049, China

Corresponding author: Ting Yang ([tingyang@mail.iap.ac.cn](mailto:tingyang@mail.iap.ac.cn))

### Three-point smoothing

1–2–1 smoother was applied in this paper. As shown in Figure S1, the 75th percentile values of  $q$ , RH, and N methods are 150–250 m higher for smooth data than original data. Besides, surface-based inversion (SI) method fails when using smooth data. For different cases, the data with better performance is different (Figure S2). The PBLH defined by the smooth data shown in Figure S2(a) is 269m, which is more reasonable than 492 m derived from original data. However, in the other case illustrated in Figure S2(b), the original profile retained the characteristics of the boundary layer, while the smooth data overestimated the PBLH by 255 m. Thus, using both original and smooth data is necessary for the integrated method to improve accuracy.

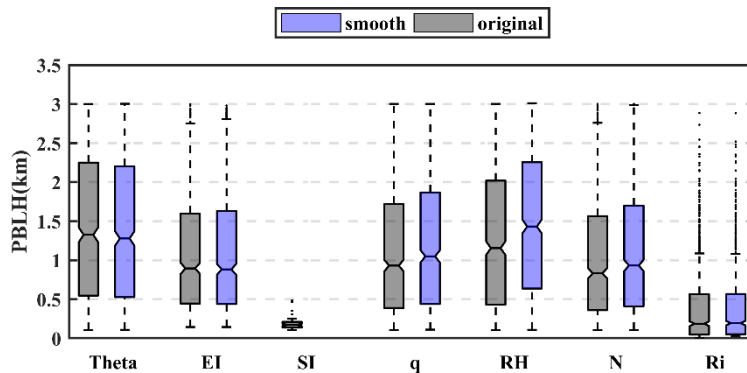

**Figure S1.** Box-and-whisker plots of PBLH calculated by different methods using original data and 1-2-1 smooth data.

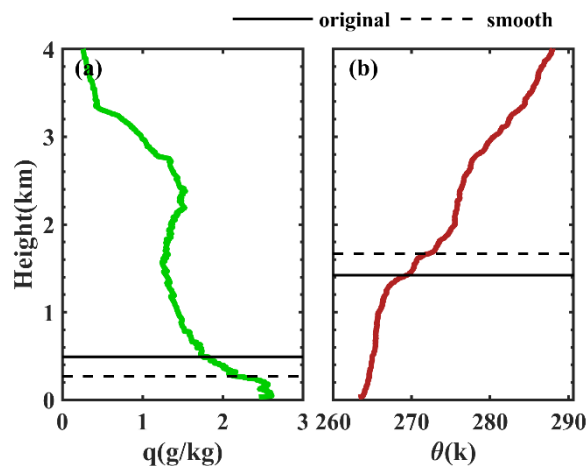

**Figure S2.** Comparison of PBLH derived from original data and smooth data at (a) 08:00 BJT on 27 February and (b) 08:00 BJT on 20 January.

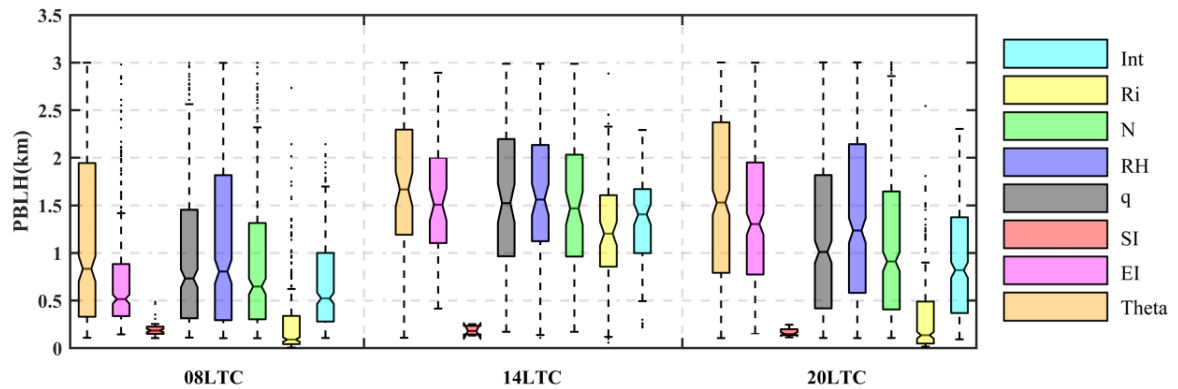

**Figure S3.** Box-and-whisker plots of PBLH calculated by different methods at 08:00, 14:00, and 20:00 LTC. The results from each single method were calculated by the original data and the comparison with 75% quantiles for gradient methods was not conducted.

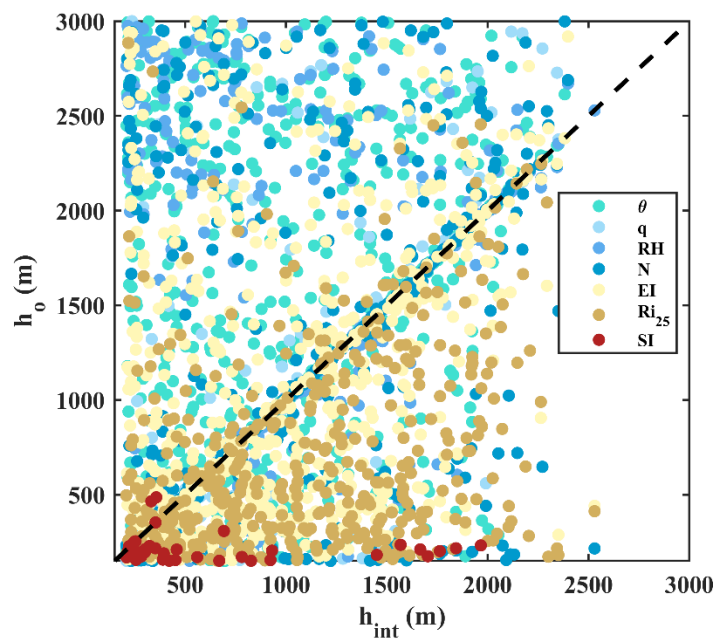

**Figure S4.** Comparison of the  $h_{int}$  and  $h_o$  for each single observation time.  $h_o$  is the PBLH derived from each individual method and  $h_{int}$  is the PBLH estimated by the integrated method.
